# Supplementary material
Source: publisher figshare collection journal article supplement (https://gsajournals.figshare.com/articles/dataset/_/9637079)
Supplement: Supplementary file 1 [file 2]

## SUPPLEMENTAL MOVIE LEGEND

**Movie 1. *pkc-3(MZ)* embryos rupture during elongation.** Differential interference contrast time-lapse movie of control (left) and *pkc-3(MZ)* (right) embryos of equivalent development stage. A single plane, with frames two minutes apart for a total of 156 minutes, is depicted.
